# Supplementary material
Source: publisher figshare collection journal article supplement (https://acs.figshare.com/ndownloader/files/5060017)
Supplement: Supplementary file 1 [file 5060017]

# Supporting Information for “Polyaniline/Au Composite Hollow Spheres: Synthesis, Characterization, and Application to the Detection of Dopamine”

Xiaomiao Feng, Changjie Mao, Gang Yang, Wenhua Hou\*, and Jun-Jie Zhu\*

Department of Chemistry, Key Laboratory of Mesoscopic Chemistry and Key Laboratory of Analytical Chemistry for Life Science, Nanjing University, Nanjing 210093, China

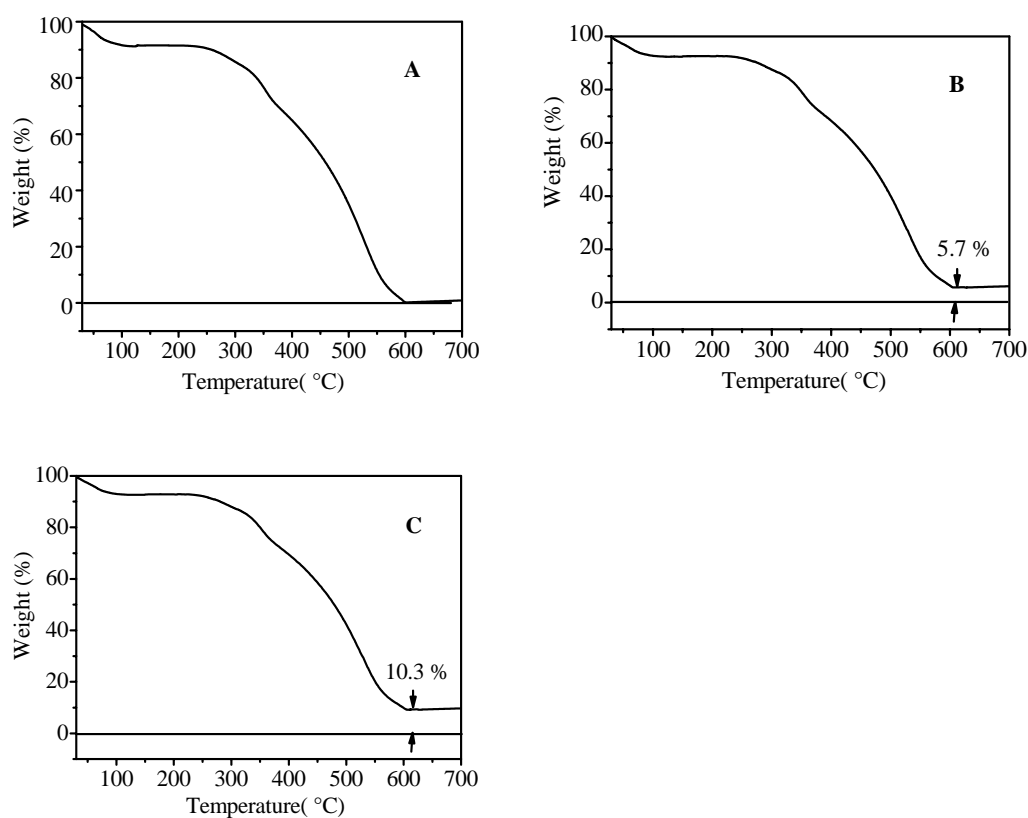

SI Figure 1. TGA curves of (A) PANI, (B) PANI/Au hollow spheres with a low content of Au NPs and (C) PANI/Au hollow spheres with a high content of Au NPs. Synthetic conditions: aniline 1 mmol, APS 1 mmol, the concentration of PANI in Au colloid is 1.0 and 0.5 mg/mL for (B) and (C), respectively.

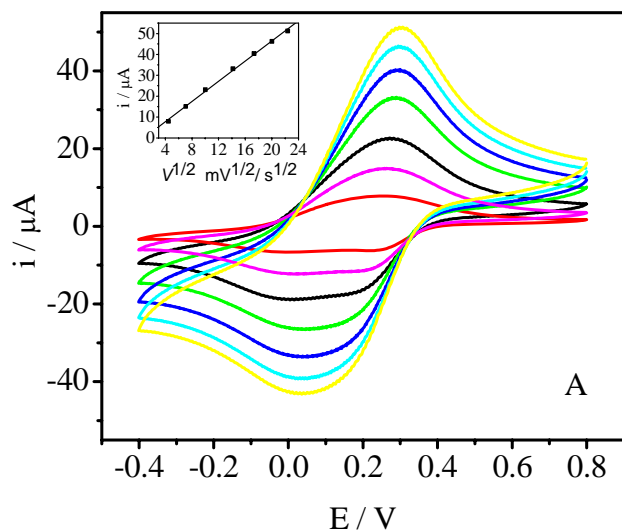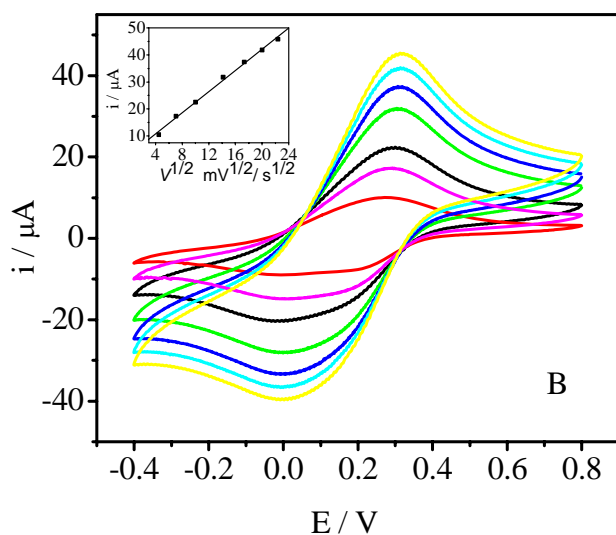

SI Figure 2. Cyclic voltammograms of (A) PANI modified GCE and (B) PANI/Au modified GCE in PBS (pH=3.0) at different scan rates: from inner to outside 20, 50, 100, 200, 300, 400, 500 mV/s. Inserts show calibration plots between the anodic peak current and the square root of the scan rate. Synthetic conditions: aniline 1 mmol, APS 1 mmol, the concentration of PANI in Au colloid 1.0 mg/mL.

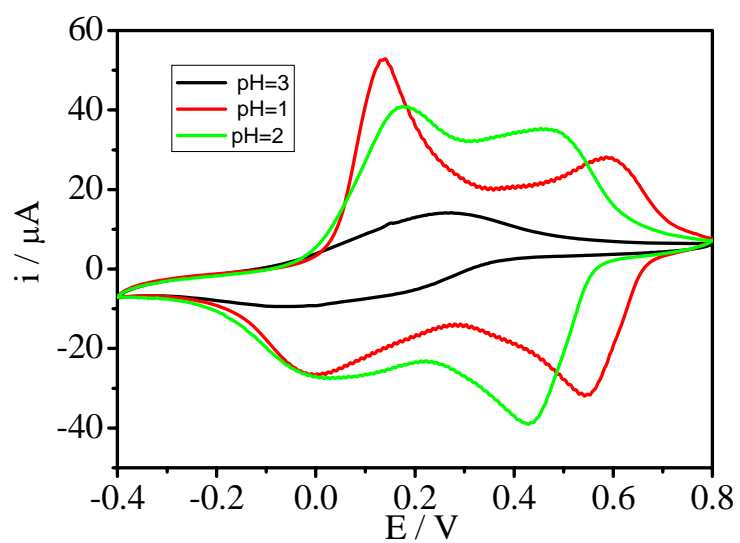

SI Figure 3. Cyclic voltammograms of PANI/Au modified GCE measured in different pH PBS buffer at a scan rate of 100 mV/s. Synthetic conditions: aniline 1 mmol, APS 1 mmol, the concentration of PANI in Au colloid 1.0 mg/mL.
